# Supplementary material for: Synaptic Dysfunction by Mutations in GRIN2B: Influence of Triheteromeric NMDA Receptors on Gain-of-Function and Loss-of-Function Mutant Classification
Source: MDPI journal article supplement (doi:10.3390/brainsci12060789), 2022-06-15
Supplement: s1 [file s1]

# Supplemental Information

## Table of Contents

|                                                                                                                                           |           |
|-------------------------------------------------------------------------------------------------------------------------------------------|-----------|
| <b>Figures S1.1 – S1.15: Summary of Linear Mixed Models (LMM)</b> .....                                                                   | <b>2</b>  |
| Figure S1.1. NMDA-EPSC peak amplitudes in GluN2A/B double KO neurons rescued with GluN2B mutants.....                                     | 3         |
| Figure S1.2. NMDA-EPSC charge transfer in GluN2A/B double KO neurons rescued with GluN2B mutants.....                                     | 4         |
| Figure S1.3. NMDA-EPSC decay in GluN2A/B double KO neurons rescued with GluN2B GOF mutants.....                                           | 5         |
| Figure S1.4. NMDA-EPSC peak amplitudes in GluN2B knockout neurons rescued with GluN2B mutants.....                                        | 6         |
| Figure S1.5. AMPA-EPSC peak amplitudes in GluN2B knockout neurons rescued with GluN2B mutants.....                                        | 7         |
| Figure S1.6. NMDA-EPSC decay in GluN2B knockout neurons rescued with GluN2B mutants.....                                                  | 8         |
| Figure S1.7. NMDA-EPSC charge transfer in GluN2B knockout neurons rescued with GluN2B mutants.....                                        | 9         |
| Figure S1.8. NMDA-EPSC peak amplitude in GluN2B knockout neurons rescued with GluN2B mutants before and after application of TCN-201..... | 10        |
| Figure S1.9. NMDA-EPSC peak amplitude in GluN2A or 2B knockout neurons rescued with C436R mutants.....                                    | 11        |
| Figure S1.10. NMDA-EPSC decay time constant in GluN2A or 2B knockout neurons rescued with C436R mutants.....                              | 12        |
| Figure S1.11. NMDA-EPSC charge transfer in GluN2A or 2B knockout neurons rescued with C436R mutants.....                                  | 13        |
| Figure S1.12. NMDA-EPSC charge transfer in neurons expressing GluN2B knockout alleles.....                                                | 14        |
| Figure S1.13. NMDA-EPSC peak amplitudes in neurons expressing GluN2B knockout alleles.....                                                | 15        |
| Figure S1.14. NMDA-EPSC decay time constant in neurons expressing GluN2B knockout alleles.....                                            | 16        |
| Figure S1.15. NMDA-EPSC risetimes in neurons expressing GluN2B knockout alleles.....                                                      | 17        |
| <b>Figure S2: Effective rescue of native mouse GluN2B by human GluN2B</b> .....                                                           | <b>18</b> |
| <b>Figure S3: GluN2B mutations are not associated with much effect on AMPAR-EPSCs</b> .....                                               | <b>19</b> |
| <b>Figure S4: NMDA-EPSC decay is similar after selective inhibition of GluN2A-containing NMDA receptors</b> .....                         | <b>20</b> |
| <b>Table S1. Matrix of orthogonal contrasts based on a priori clustering of mutations</b> .....                                           | <b>21</b> |
| <b>Table S2: Primers used to generate mutant GluN2B constructs from WT pCI-Neo GRIN2B</b> .....                                           | <b>22</b> |
| <b>Table S3. Experiment sample sizes</b> .....                                                                                            | <b>23</b> |
| <b>Table S4. Functional properties of NMDA receptor subtypes in HEK293T cells</b> .....                                                   | <b>24</b> |
| <b>Table S5. Effects of TCN-201 on responses from NMDA receptors in HEK293T cells</b> .....                                               | <b>25</b> |

### Figures S1.1 – S1.15: Summary of Linear Mixed Models (LMM)

The top of each of the following figures (S1.1 – S1.15) includes: the `lmer` (Wilkinson-Rogers-Pinheiro-Bates) model formula, an ANOVA table with  $F(df, df_{res})$  statistics,  $p$ -values, and Bayes factors for hypothesis tests of interests on fixed effects, and a table of group sample size and intraclass correlation (ICC) for nuisance random effects. The bottom of each of the following figures also includes a series of plots that can be used to evaluate the validity of LMM assumptions including homoscedasticity of model residuals and their likeness to a Normally distribution. **a)** Standardized residuals plotted against the fitted values with smoothed conditional mean (red) and conditional median accompanied by lower and upper quartiles (blue) ; **b)** Histogram of residual overlaid with fitted Gaussian distribution (red) and kernel density estimate (blue); **c)** quantile-quantile (Q-Q) plot with 95% confidence bands; and **d)** Stem-and-leaf plot of Cook's distances.

**Figure S1.1. NMDA-EPSC peak amplitudes in GluN2A/B double KO neurons rescued with GluN2B mutants**

**Top.** Summary tables based on a Linear Mixed Model (LMM) predicting NMDA-EPSC peak amplitude from the co-transfection of different *GRIN2B* mutants together with Cre-GFP in CA1 neurons of *Grin2a<sup>fl/fl</sup>2b<sup>fl/fl</sup>* slices. Fixed effects are summarised as an ANOVA table with the interaction term followed up with Dunnett's step-down posthoc comparisons. The *p*-value and Bayes factor for the interaction term (mutation:transfection) indicate a highly significant effect of transfecting GluN2B mutants on the peak amplitude of NMDA-EPSCs in GluN2A/B double knockout (KO) neurons. Of the variance not accounted for by the fixed effects, 4%, 7%, 9% and 80% was explained by variability between recording pairs, slices, animals and by residual (unexplained) variance respectively. **Bottom.** Model residuals appeared to be homoscedastic (a) and normally distributed (b, c), with very few outlying data points (a, c) and no influential data points (i.e. Cook's distance < 1.0) (d). A breakdown of samples sizes is reported in Table S3.

| Response                                                                                                    |        |      |                   |                  |                  |
|-------------------------------------------------------------------------------------------------------------|--------|------|-------------------|------------------|------------------|
| NMDA-EPSC peak amplitude (peak)                                                                             |        |      |                   |                  |                  |
| Formula                                                                                                     |        |      |                   |                  |                  |
| $\log(\text{peak}) \sim \text{mutation} * \text{transfection} + (1 \text{animal}/\text{slice}/\text{pair})$ |        |      |                   |                  |                  |
| Source (Fixed)                                                                                              | F      | df   | df <sub>res</sub> | p                | BF <sub>10</sub> |
| mutation                                                                                                    | 4.26   | 4    | 8.9               |                  |                  |
| transfection                                                                                                | 500.43 | 1    | 85                |                  |                  |
| mutation:transfection                                                                                       | 17.04  | 4    | 85                | <.001            | 4.2E+10          |
| Posthoc test                                                                                                |        | t    | df                | p <sub>adj</sub> |                  |
| WT vs. None                                                                                                 |        | 7.27 | 85                | <.001            |                  |
| R540H vs. None                                                                                              |        | 3.93 | 85                | <.001            |                  |
| R696H vs. None                                                                                              |        | 3.10 | 85                | .005             |                  |
| C456Y vs. None                                                                                              |        | 0.97 | 85                | .34              |                  |
| Source (random)                                                                                             | N      | ICC  |                   |                  |                  |
| pair:(slice:animal)                                                                                         | 90     | .04  |                   |                  |                  |
| slice:animal                                                                                                | 57     | .07  |                   |                  |                  |
| animal                                                                                                      | 14     | .09  |                   |                  |                  |
| Residual                                                                                                    |        | .80  |                   |                  |                  |

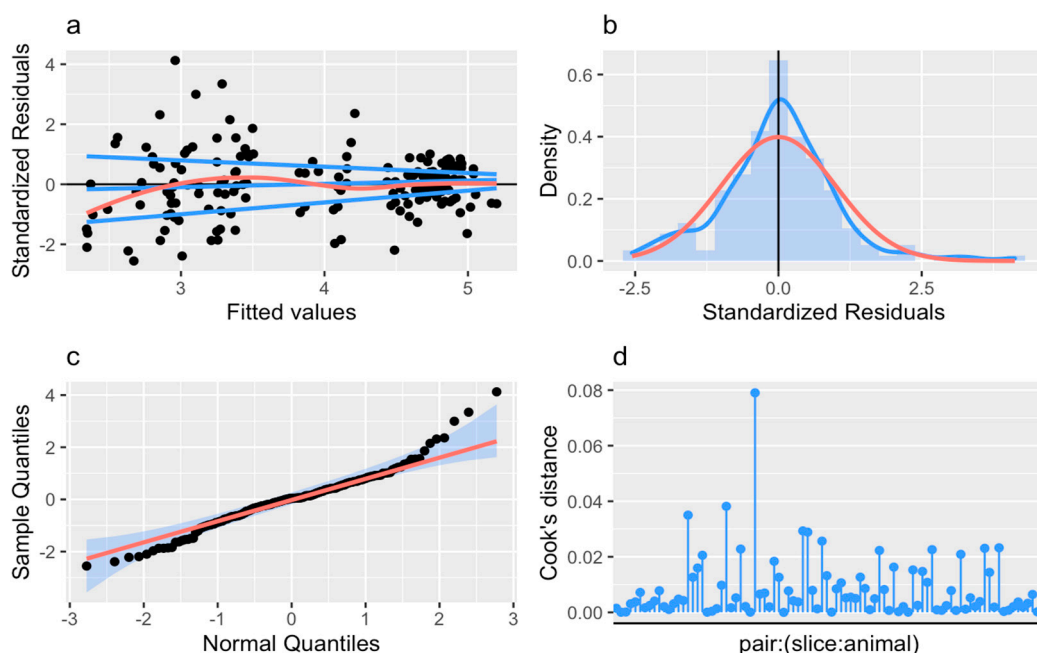

**Figure S1.2. NMDA-EPSC charge transfer in *GluN2A/B* double KO neurons rescued with *GluN2B* mutants**

**Top.** Summary tables based on a Linear Mixed Model (LMM) predicting NMDA-EPSC charge transfer from the co-transfection of different *GRIN2B* mutants together with Cre-GFP in CA1 neurons of *Grin2a<sup>fl/fl</sup>2b<sup>fl/fl</sup>* slices. Fixed effects are summarised as an ANOVA table with the interaction term followed up with Dunnett’s step-down posthoc comparisons. The *p*-value and Bayes factor for the interaction term (mutation:transfection) indicate a highly significant effect of transfecting GluN2B mutants on the peak amplitude of NMDA-EPSCs in GluN2A/B double knockout (KO) neurons. Of the variance not accounted for by the fixed effects, 7%, 0%, 2% and 91% was explained by variability between recording pairs, slices, animals and by residual (unexplained) variance respectively.

**Bottom.** Model residuals appeared to be homoscedastic (a), normally distributed (b, c), without overt outliers (a, c) and without influential data points (i.e. Cook’s distance < 1.0) (d). A breakdown of samples sizes is reported in Table S3.

| Response                                                      |       |     |                   |       |                  |
|---------------------------------------------------------------|-------|-----|-------------------|-------|------------------|
| NMDA-EPSC charge transfer                                     |       |     |                   |       |                  |
| Formula                                                       |       |     |                   |       |                  |
| log(charge) ~ mutation * transfection + (1 animal/slice/pair) |       |     |                   |       |                  |
| Source (Fixed)                                                | F     | df  | df <sub>res</sub> | p     | BF <sub>10</sub> |
| mutation                                                      | 10.62 | 3   | 6.87              |       |                  |
| transfection                                                  | 41.57 | 1   | 67                |       |                  |
| mutation:transfection                                         | 23.65 | 3   | 67                | <.001 | 4.3E+11          |
| Posthoc test                                                  | t     | df  | p <sub>adj</sub>  |       |                  |
| R540H vs. WT                                                  | -1.01 | 67  | .32               |       |                  |
| R696H vs. WT                                                  | -1.45 | 67  | .27               |       |                  |
| C456Y vs. WT                                                  | -7.62 | 67  | <.001             |       |                  |
| Source (random)                                               | N     | ICC |                   |       |                  |
| pair:(slice:animal)                                           | 71    | .07 |                   |       |                  |
| slice:animal                                                  | 46    | .00 |                   |       |                  |
| animal                                                        | 11    | .02 |                   |       |                  |
| Residual                                                      |       | .91 |                   |       |                  |

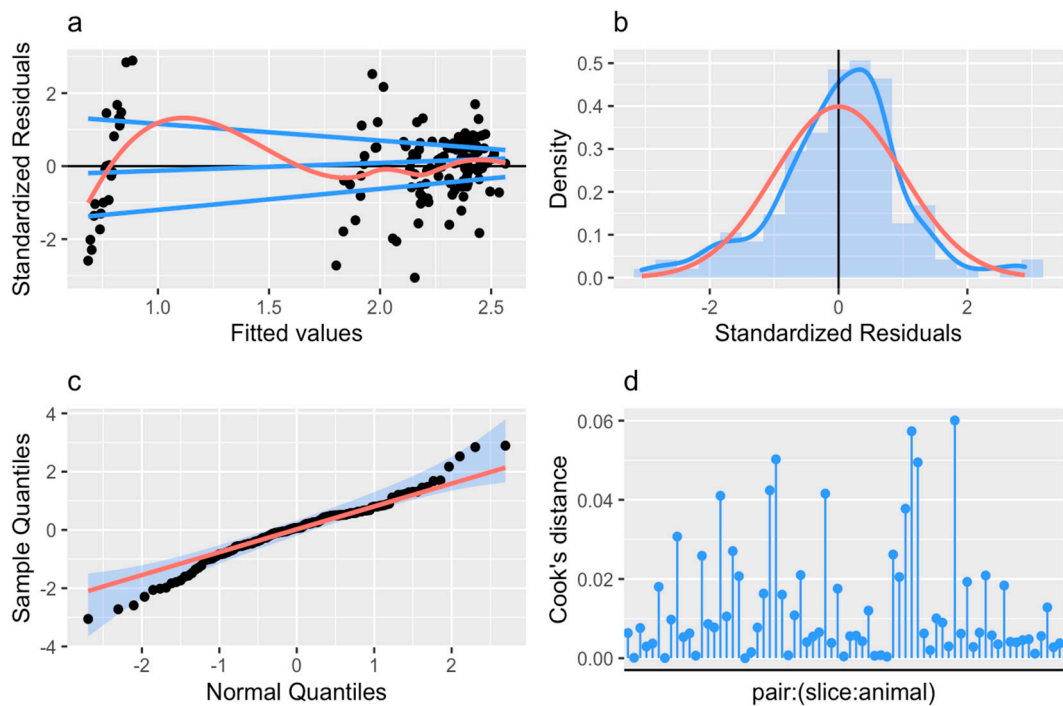

**Figure S1.3. NMDA-EPSC decay in *GluN2A/B* double KO neurons rescued with *GluN2B* GOF mutants**

**Top.** Summary tables based on a Linear Mixed Model (LMM) predicting NMDA-EPSC decay time constant from the co-transfection of different *GRIN2B* GoF mutants together with Cre-GFP in CA1 neurons of *Grin2a<sup>fl/fl</sup>2b<sup>fl/fl</sup>* slices. Fixed effects are summarised as an ANOVA table with the interaction term followed up with Dunnett's step-down posthoc comparisons. The *p*-value and Bayes factor for the interaction term (mutation:transfection) indicate a significant effect of transfecting *GluN2B* GoF mutants on the decay time constant of NMDA-EPSCs in *GluN2A/B* double knockout (KO) neurons. All of the variance not accounted for by the fixed effects was residual, unexplained variance. **Bottom.** Model residuals appeared to be homoscedastic (a), normally distributed (b, c), without overt outliers (a, c) and without influential data points (i.e. Cook's distance < 1.0) (d). A breakdown of samples sizes is reported in Table S3.

| Response                                                                                     |          |           |                         |                        |                        |
|----------------------------------------------------------------------------------------------|----------|-----------|-------------------------|------------------------|------------------------|
| NMDA-EPSC decay time constant (decay)                                                        |          |           |                         |                        |                        |
| Formula                                                                                      |          |           |                         |                        |                        |
| log( <i>decay</i> ) ~ <i>mutation</i> * <i>transfection</i> + (1  <i>animal/slice/pair</i> ) |          |           |                         |                        |                        |
| Source (Fixed)                                                                               | <i>F</i> | <i>df</i> | <i>df<sub>res</sub></i> | <i>p</i>               | <i>BF<sub>10</sub></i> |
| mutation                                                                                     | 8.44     | 2         | 4.56                    |                        |                        |
| transfection                                                                                 | 244.54   | 1         | 44                      |                        |                        |
| mutation:transfection                                                                        | 3.81     | 2         | 44                      | .03                    | 6.19                   |
| Posthoc test                                                                                 | <i>t</i> |           | <i>df</i>               | <i>p<sub>adj</sub></i> |                        |
| R540H vs. WT                                                                                 | 2.32     |           | 44                      | .046                   |                        |
| R696H vs. WT                                                                                 | 2.33     |           | 44                      | .046                   |                        |
| Source (random)                                                                              | <i>N</i> | ICC       |                         |                        |                        |
| pair:(slice:animal)                                                                          | 47       | 0         |                         |                        |                        |
| slice:animal                                                                                 | 32       | 0         |                         |                        |                        |
| animal                                                                                       | 8        | 0         |                         |                        |                        |
| Residual                                                                                     |          | 1         |                         |                        |                        |

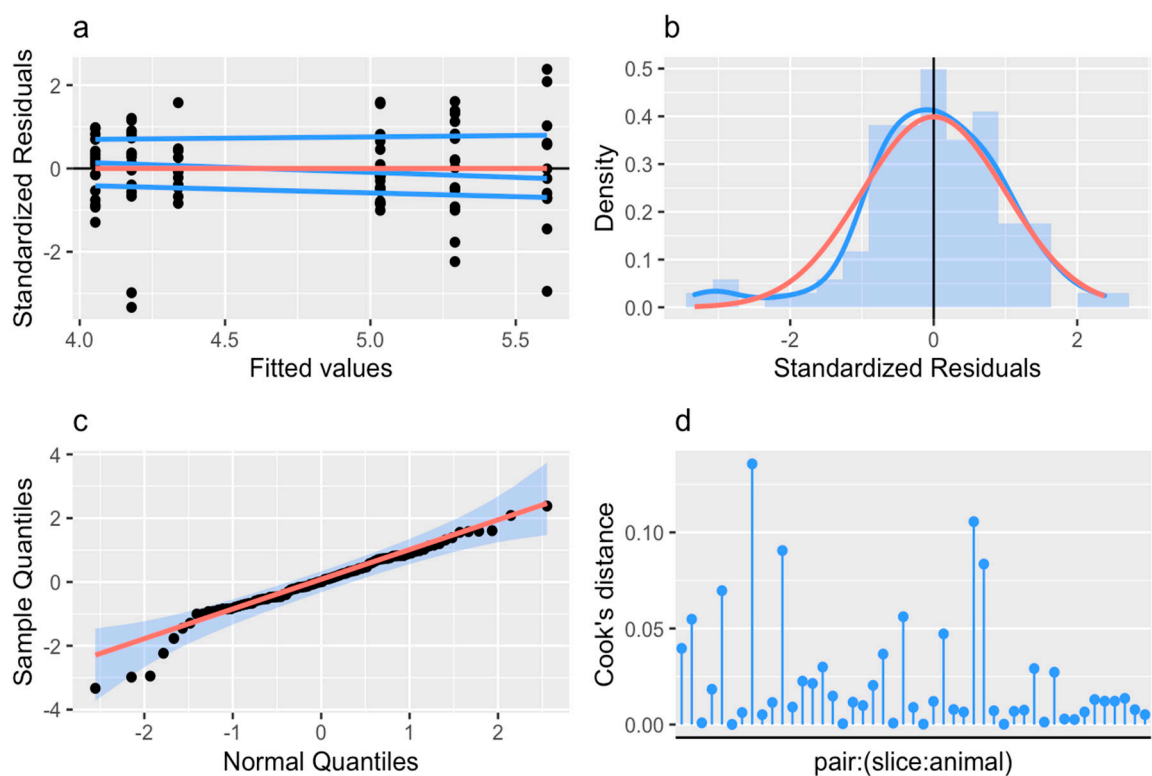

**Figure S1.4. NMDA-EPSC peak amplitudes in GluN2B knockout neurons rescued with GluN2B mutants.**

**Top.** Summary tables based on a Linear Mixed Model (LMM) predicting NMDA-EPSC peak amplitude from the co-transfection of different *GRIN2B* GoF mutants together with Cre-GFP in CA1 neurons of *Grin2b<sup>fl/fl</sup>* slices. Fixed effects are summarised as an ANOVA table with the interaction term decomposed into orthogonal contrasts (A-D, see Table S1). The Bayes factor for the interaction term (mutation:transfection) provides evidence more in favour of no effect of GluN2B mutants on the peak amplitude of NMDA-EPSCs in GluN2B knockout (KO) neurons. Of the variance not accounted for by the fixed effects, 16%, 27%, 36% and 21% was explained by variability between recording pairs, slices, animals, and residual (unexplained) variance respectively. **Bottom.** Model residuals appeared to be homoscedastic (a), normally distributed (b, c), without overt outliers (a, c) and without influential data points (i.e. Cook's distance < 1.0) (d). A breakdown of samples sizes is reported in Table S3.

### Response

NMDA-EPSC peak amplitude (peak)

### Formula

$\log(\text{peak}) \sim \text{mutation} * \text{transfection} + (1|\text{animal/slice/pair})$

| Source (Fixed)                      | F     | df  | df <sub>res</sub> | p   | BF <sub>10</sub> |
|-------------------------------------|-------|-----|-------------------|-----|------------------|
| mutation                            | 2.91  | 4   | 16.22             |     |                  |
| transfection                        | 49.75 | 1   | 90                |     |                  |
| mutation:transfection               | 0.21  | 4   | 90                | .93 | 0.052            |
| A. WT vs R540H, R696H, C456Y, C461F | 0.38  | 1   | 90                | .54 |                  |
| B. C456Y, C461F vs R540H, R696H     | 0.40  | 1   | 90                | .53 |                  |
| C. C456Y vs. C461F                  | 0.07  | 1   | 90                | .80 |                  |
| D. R540H vs. R696H                  | 0.04  | 1   | 90                | .85 |                  |
| Source (random)                     | N     | ICC |                   |     |                  |
| pair:(slice:animal)                 | 95    | .16 |                   |     |                  |
| slice:animal                        | 62    | .27 |                   |     |                  |
| animal                              | 22    | .36 |                   |     |                  |
| Residual                            |       | .21 |                   |     |                  |

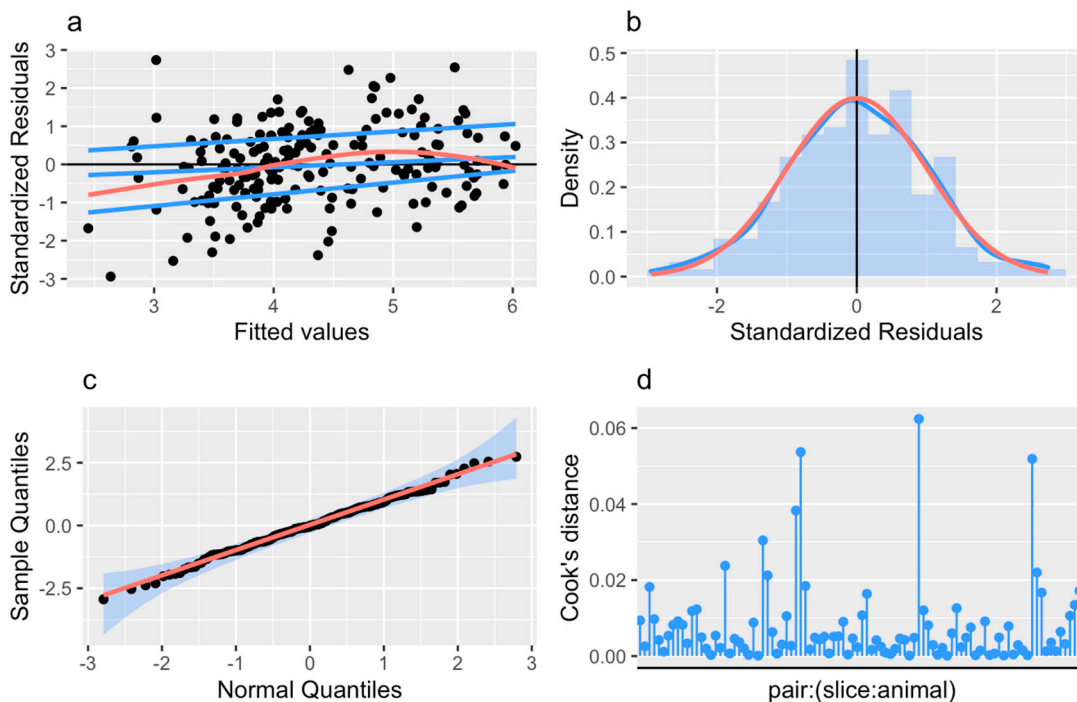

**Figure S1.5. AMPA-EPSC peak amplitudes in GluN2B knockout neurons rescued with GluN2B mutants.**

**Top.** Summary tables based on a Linear Mixed Model (LMM) predicting AMPA-EPSC peak amplitude from the co-transfection of different *GRIN2B* mutants together with Cre-GFP in CA1 neurons of *Grin2b<sup>fl/fl</sup>* slices. Fixed effects are summarised as an ANOVA table with the interaction term decomposed into orthogonal contrasts (A-D, see Table S1). The Bayes factor for the interaction term (mutation:transfection) provides reasonable evidence for no effect of GluN2B mutants on the peak amplitude of AMPA-EPSCs in GluN2B knockout (KO) neurons. Of the variance not accounted for by the fixed effects, 9%, 18%, 34% and 39% was explained by variability between recording pairs, slices, animals, and residual (unexplained) variance respectively. **Bottom.** Model residuals appeared to be homoscedastic (a), normally distributed (b, c), without overt outliers (a, c) and without influential data points (i.e. Cook's distance < 1.0) (d). A breakdown of samples sizes is reported in Table S3.

| Response                                                                                                    |      |     |                   |      |                  |
|-------------------------------------------------------------------------------------------------------------|------|-----|-------------------|------|------------------|
| AMPA-EPSC peak amplitude                                                                                    |      |     |                   |      |                  |
| Formula                                                                                                     |      |     |                   |      |                  |
| $\log(\text{peak}) \sim \text{mutation} * \text{transfection} + (1 \text{animal}/\text{slice}/\text{pair})$ |      |     |                   |      |                  |
| Source (Fixed)                                                                                              | F    | df  | df <sub>res</sub> | p    | BF <sub>10</sub> |
| mutation                                                                                                    | 9.08 | 4   | 16.25             |      |                  |
| transfection                                                                                                | 0.77 | 1   | 90                |      |                  |
| mutation:transfection                                                                                       | 1.17 | 4   | 90                | .33  | 0.197            |
| A. WT vs R540H, R696H, C456Y, C461F                                                                         | 0.18 | 1   | 90                | .68  |                  |
| B. C456Y, C461F vs R540H, R696H                                                                             | 1.22 | 1   | 90                | .27  |                  |
| C. C456Y vs. C461F                                                                                          | 3.41 | 1   | 90                | .069 |                  |
| D. R540H vs. R696H                                                                                          | 0.14 | 1   | 90                | .71  |                  |
| Source (random)                                                                                             | N    | ICC |                   |      |                  |
| pair:(slice:animal)                                                                                         | 95   | .09 |                   |      |                  |
| slice:animal                                                                                                | 62   | .18 |                   |      |                  |
| animal                                                                                                      | 22   | .34 |                   |      |                  |
| Residual                                                                                                    |      | .39 |                   |      |                  |

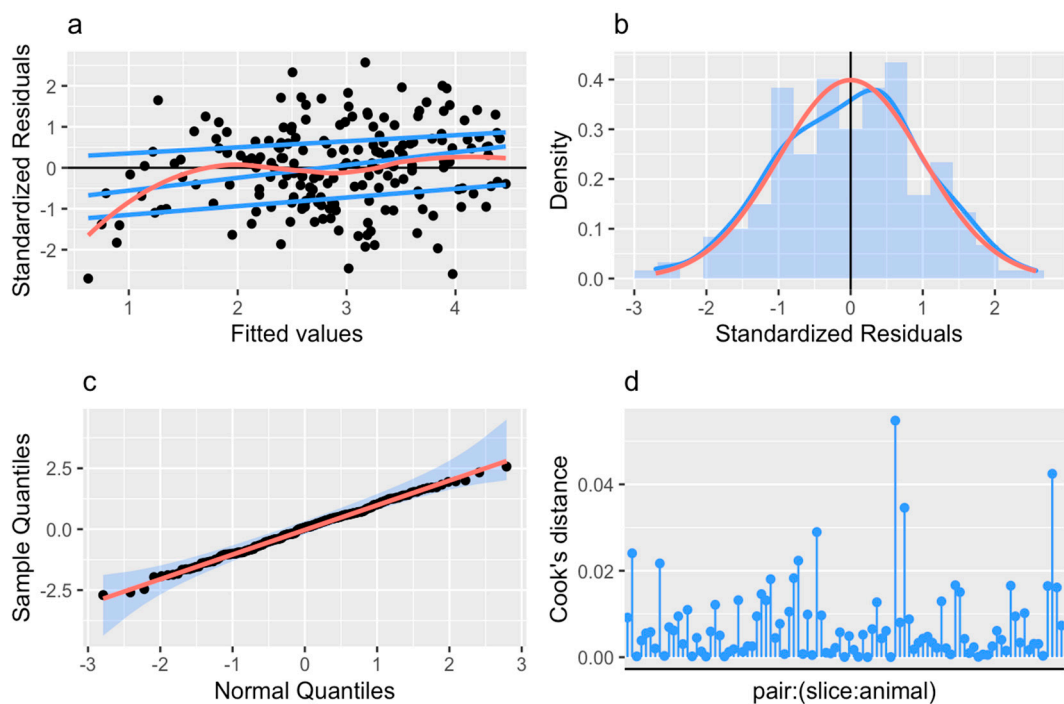



**Figure S1.6. NMDA-EPSC decay in *GluN2B* knockout neurons rescued with *GluN2B* mutants.**

**Top.** Summary tables based on a Linear Mixed Model (LMM) predicting NMDA-EPSC decay time constant from the co-transfection of different *GRIN2B* mutants together with Cre-GFP in CA1 neurons of *Grin2b<sup>fl/fl</sup>* slices. Fixed effects are summarised as an ANOVA table with the interaction term decomposed into orthogonal contrasts (A-D, see Table S1). The *p*-value and Bayes factor for the interaction term (mutation:transfection) indicate a highly significant effect of transfecting GluN2B mutants on the decay time constant of NMDA-EPSCs in GluN2B knockout (KO) neurons. Of the variance not accounted for by the fixed effects, 0%, 0%, 19% and 81% was explained by variability between recording pairs, slices, animals, and residual (unexplained) variance respectively. **Bottom.** Model residuals appeared to be homoscedastic (a), normally distributed (b, c), without overt outliers (a, c) and without influential data points (i.e. Cook's distance < 1.0) (d). A breakdown of samples sizes is reported in Table S3.

#### Response

NMDA-EPSC decay time constant (decay)

#### Formula

$\log(\text{decay}) \sim \text{mutation} * \text{transfection} + (1|\text{animal/slice/pair})$

| Source (Fixed)                      | F     | df  | df <sub>res</sub> | p     | BF <sub>10</sub> |
|-------------------------------------|-------|-----|-------------------|-------|------------------|
| mutation                            | 2.67  | 4   | 15.78             |       |                  |
| transfection                        | 48.45 | 1   | 90                |       |                  |
| mutation:transfection               | 8.85  | 4   | 90                | <.001 | 1.52E+05         |
| A. WT vs R540H, R696H, C456Y, C461F | 19.20 | 1   | 90                | <.001 |                  |
| B. C456Y, C461F vs R540H, R696H     | 17.17 | 1   | 90                | <.001 |                  |
| C. C456Y vs. C461F                  | 0.76  | 1   | 90                | .39   |                  |
| D. R540H vs. R696H                  | 0.24  | 1   | 90                | .63   |                  |
| Source (random)                     | N     | ICC |                   |       |                  |
| pair:(slice:animal)                 | 95    | .00 |                   |       |                  |
| slice:animal                        | 62    | .00 |                   |       |                  |
| animal                              | 22    | .19 |                   |       |                  |
| Residual                            |       | .81 |                   |       |                  |

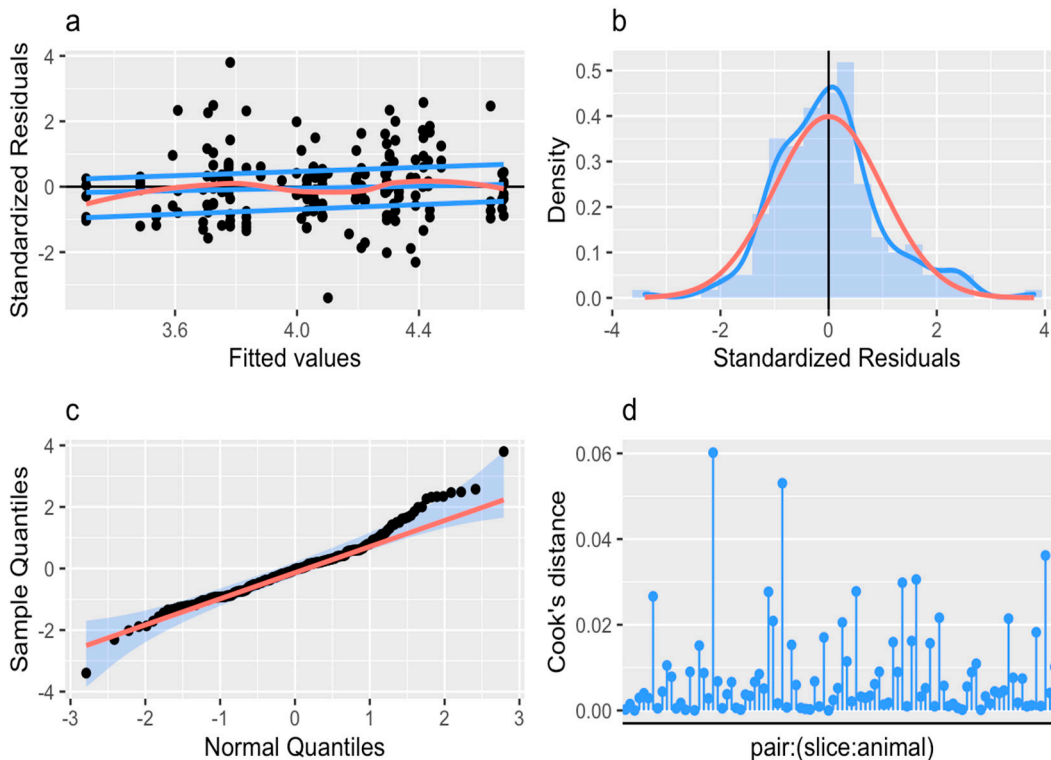



**Figure S1.7. NMDA-EPSC charge transfer in *GluN2B* knockout neurons rescued with *GluN2B* mutants.**

**Top.** Summary tables based on a Linear Mixed Model (LMM) predicting NMDA-EPSC charge transfer from the co-transfection of different *GRIN2B* mutants together with Cre-GFP in CA1 neurons of *Grin2b<sup>fl/fl</sup>* slices. Fixed effects are summarised as an ANOVA table with the interaction term decomposed into orthogonal contrasts (A-D, see Table S1). The p-value and Bayes factor for the interaction term (mutation:transfection) indicate a significant effect of GluN2B mutants on the charge transfer of NMDA-EPSCs in GluN2B knockout (KO) neurons. Of the variance not accounted for by the fixed effects, 9%, 22%, 36% and 33% was explained by variability between recording pairs, slices, animals, and residual (unexplained) variance respectively. **Bottom.** Model residuals appeared to be homoscedastic (a), normally distributed (b, c), without overt outliers (a, c) and without influential data points (i.e. Cook's distance < 1.0) (d). A breakdown of samples sizes is reported in Table S3.

### Response

NMDA-EPSC charge transfer (charge)

### Formula

$\log(\text{charge}) \sim \text{mutation} * \text{transfection} + (1|\text{animal}/\text{slice}/\text{pair})$

| Source (Fixed)                      | F     | df  | df <sub>res</sub> | p    | BF <sub>10</sub> |
|-------------------------------------|-------|-----|-------------------|------|------------------|
| mutation                            | 3.00  | 4   | 16.28             |      |                  |
| transfection                        | 57.13 | 1   | 90                |      |                  |
| mutation:transfection               | 3.63  | 4   | 90                | .009 | 5.16             |
| A. WT vs R540H, R696H, C456Y, C461F | 4.81  | 1   | 90                | .031 |                  |
| B. C456Y, C461F vs R540H, R696H     | 10.02 | 1   | 90                | .002 |                  |
| C. C456Y vs. C461F                  | 0.75  | 1   | 90                | .39  |                  |
| D. R540H vs. R696H                  | 0.13  | 1   | 90                | .72  |                  |
| Source (random)                     | N     | ICC |                   |      |                  |
| pair:(slice:animal)                 | 95    | .09 |                   |      |                  |
| slice:animal                        | 62    | .22 |                   |      |                  |
| animal                              | 22    | .36 |                   |      |                  |
| Residual                            |       | .33 |                   |      |                  |

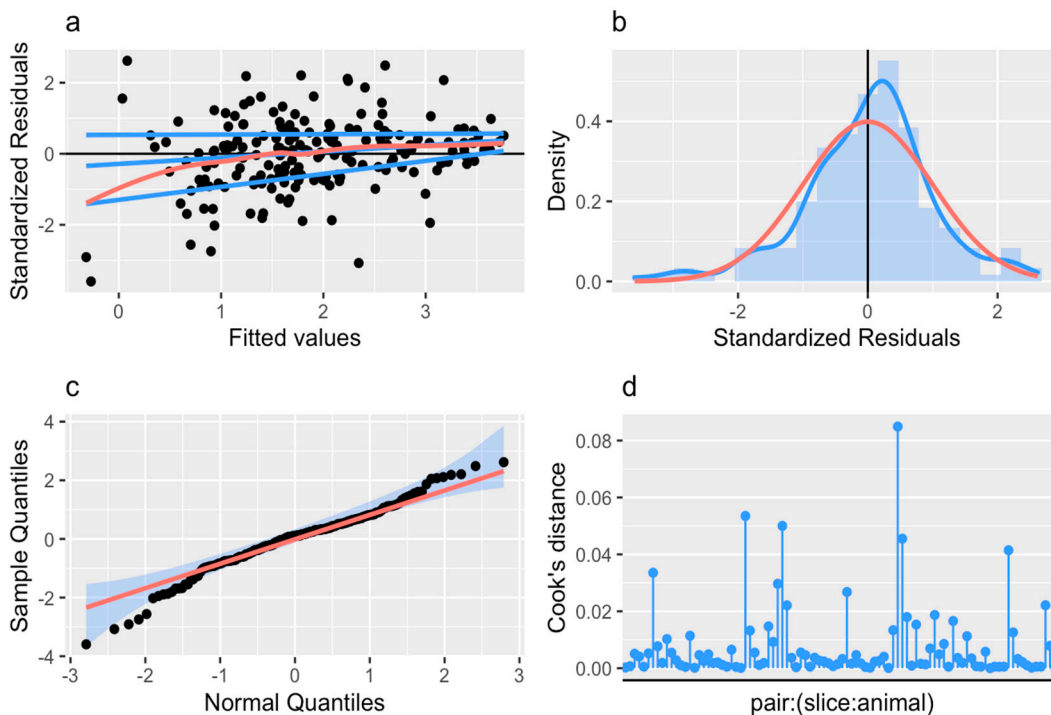

**Figure S1.8. NMDA-EPSC peak amplitude in GluN2B knockout neurons rescued with GluN2B mutants before and after application of TCN-201.**

**Top.** Summary tables based on a Linear Mixed Model (LMM) predicting the effect of TCN-201 on NMDA-EPSC peak amplitude from the co-transfection of different *GRIN2B* mutants together with Cre-GFP in CA1 neurons of *Grin2b<sup>fl/fl</sup>* slices. Fixed effects are summarised as an ANOVA table with the interaction term decomposed into orthogonal contrasts and followed up with pairwise comparisons by Westfall stepwise posthoc tests. The *p*-value and Bayes factor for the interaction term (mutation:drug) indicate a significant effect of TCN-201 on NMDA-EPSC peak amplitude depending on the GluN2B mutant expressed in GluN2B knockout (KO) neurons. Of the variance not accounted for by the fixed effects, 47, 2, 9 and 44% was explained by variability between cells, slices, animals and residual (unexplained) variance respectively. **Bottom.** Model residuals appeared to be homoscedastic (a), normally distributed (b, c), without overt outliers (a, c) and without influential data points (i.e. Cook's distance < 1.0) (d). A breakdown of samples sizes is reported in Table S3.

## Response

NMDA-EPSC peak amplitude (peak)

## Formula

$\log(\text{peak}) \sim \text{mutation} * \text{drug} + (1|\text{animal}/\text{slice}/\text{cell})$

| Source (Fixed)        | <i>F</i> | <i>df</i> | <i>df<sub>res</sub></i> | <i>p</i> | <i>BF<sub>10</sub></i> |
|-----------------------|----------|-----------|-------------------------|----------|------------------------|
| mutation              | 2.79     | 2         | 1.71                    |          |                        |
| drug                  | 122.3    | 1         | 35                      |          |                        |
| mutation:drug         | 3.95     | 2         | 35                      | .028     | 2.83                   |
| A. WT vs R696H, C456Y | 7.81     | 1         | 35                      | .008     |                        |
| B. R696H vs C456Y     | 0.03     | 1         | 35                      | .86      |                        |

| Posthoc test    | <i>t</i> | <i>df</i> | <i>p<sub>adj</sub></i> |
|-----------------|----------|-----------|------------------------|
| R696H vs. WT    | -2.37    | 35        | .035                   |
| C456Y vs. WT    | -2.61    | 35        | .035                   |
| C456Y vs. R696H | -0.18    | 35        | .86                    |

| Source (random) | <i>N</i> | ICC |
|-----------------|----------|-----|
| cell            | 38       | .47 |
| slice           | 26       | .02 |
| animal          | 5        | .09 |
| Residual        |          | .42 |

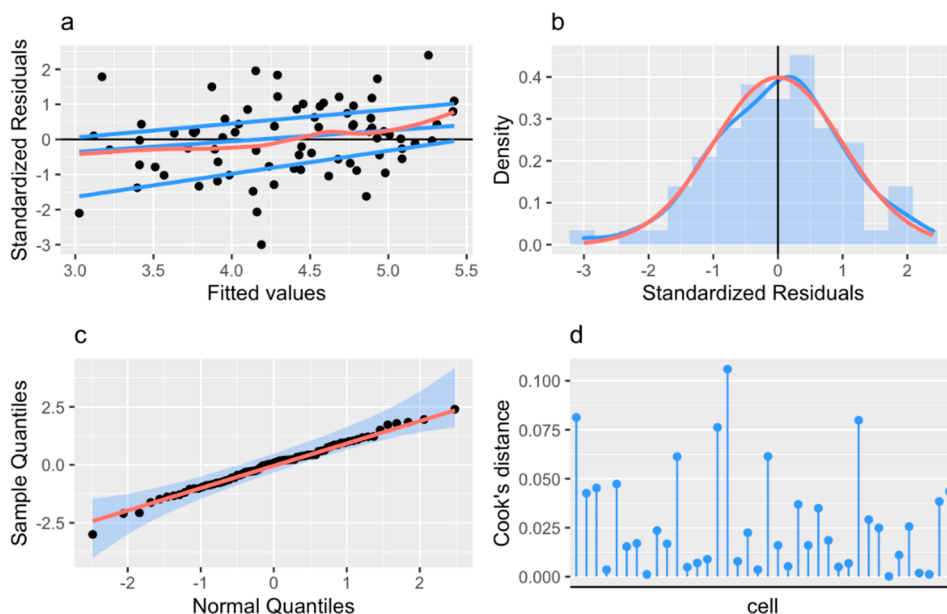

**Figure S1.9. NMDA-EPSC peak amplitude in *GluN2A* or *2B* knockout neurons rescued with C436R mutants.**

**Top.** Summary tables based on a LMM predicting NMDA-EPSC peak amplitude from the co-transfection of the C436R mutant in *GRIN2A* or *GRIN2B* subunits together with Cre-GFP in CA1 neurons of *Grin2a<sup>fl/fl</sup>* or *Grin2b<sup>fl/fl</sup>* slices respectively. Fixed effects are summarised as an ANOVA table with the interaction term decomposed into orthogonal contrasts (A-D see Table S1). The Bayes factor for the interaction term (subunit:transfection) provides reasonable evidence for no effect of the subunit (*GluN2A* or *2B*) on the peak amplitude of NMDA-EPSCs in KO neurons rescued with the C436R mutants. Of the variance not accounted for by the fixed effects, 40%, 40%, 0% and 20% was explained by variability between recording pairs, slices, animals, and residual (unexplained) variance respectively. **Bottom.** Model residuals appeared to be homoscedastic (a), normally distributed (b, c), without overt outliers (a, c) and without influential data points (i.e. Cook’s distance < 1.0) (d). A breakdown of samples sizes is reported in Table S3.

| Response                                                                                                   |       |     |                   |     |                  |
|------------------------------------------------------------------------------------------------------------|-------|-----|-------------------|-----|------------------|
| NMDA-EPSC peak amplitude (peak)                                                                            |       |     |                   |     |                  |
| Formula                                                                                                    |       |     |                   |     |                  |
| $\log(\text{peak}) \sim \text{subunit} * \text{transfection} + (1 \text{animal}/\text{slice}/\text{pair})$ |       |     |                   |     |                  |
| Source (Fixed)                                                                                             | F     | df  | df <sub>res</sub> | p   | BF <sub>10</sub> |
| subunit                                                                                                    | 18.19 | 1   | 5.27              |     |                  |
| transfection                                                                                               | 38.33 | 1   | 31                |     |                  |
| subunit:transfection                                                                                       | 0.18  | 1   | 31                | .67 | 0.368            |
| Source (random)                                                                                            | N     | ICC |                   |     |                  |
| pair:(slice:animal)                                                                                        | 33    | .40 |                   |     |                  |
| slice:animal                                                                                               | 21    | .40 |                   |     |                  |
| animal                                                                                                     | 9     | .00 |                   |     |                  |
| Residual                                                                                                   |       | .20 |                   |     |                  |

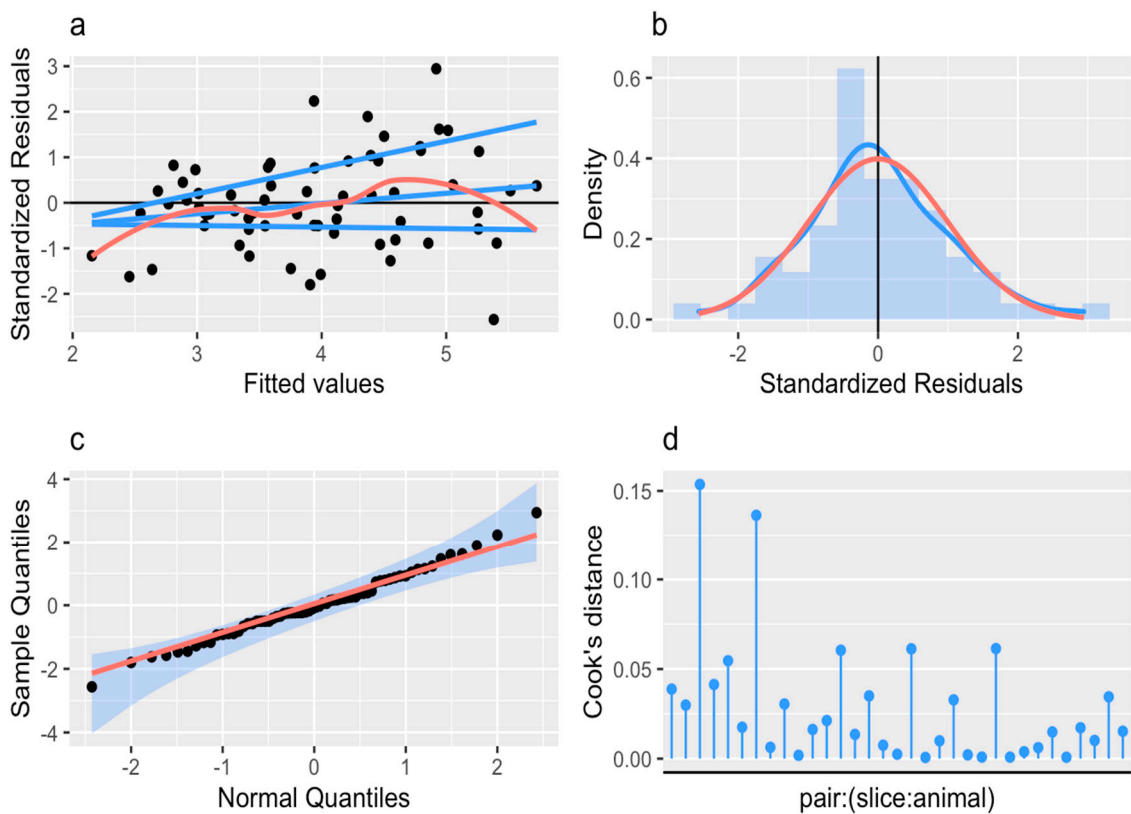

**Figure S1.10. NMDA-EPSC decay time constant in *GluN2A* or *2B* knockout neurons rescued with C436R mutants.**

**Top.** Summary tables based on a LMM predicting NMDA-EPSC decay time constant from the co-transfection of the C436R mutant in *GRIN2A* or *GRIN2B* subunits together with Cre-GFP in CA1 neurons of *Grin2a<sup>fl/fl</sup>* or *Grin2b<sup>fl/fl</sup>* slices respectively. Fixed effects are summarised as an ANOVA table with the interaction term decomposed into orthogonal contrasts (A-D see Table S1). The *p*-value and Bayes factor for the interaction term (subunit:transfection) indicate a highly significant effect of transfecting different subunits (GluN2A or 2B) of the C436R mutant on the decay time constant of NMDA-EPSCs in KO neurons. Of the variance not accounted for by the fixed effects, 0%, 0%, 17% and 83% was explained by variability between recording pairs, slices, animals, and residual (unexplained) variance respectively. **Bottom.** Model residuals appeared to be homoscedastic (**a**), normally distributed (**b, c**), without overt outliers (**a, c**) and without influential data points (i.e. Cook's distance < 1.0) (**d**). A breakdown of samples sizes is reported in Table S3.

| Response                                                                                                    |          |           |                         |          |                        |
|-------------------------------------------------------------------------------------------------------------|----------|-----------|-------------------------|----------|------------------------|
| NMDA-EPSC decay time constant (decay)                                                                       |          |           |                         |          |                        |
| Formula                                                                                                     |          |           |                         |          |                        |
| $\log(\text{decay}) \sim \text{subunit} * \text{transfection} + (1 \text{animal}/\text{slice}/\text{pair})$ |          |           |                         |          |                        |
| Source (Fixed)                                                                                              | <i>F</i> | <i>df</i> | <i>df<sub>res</sub></i> | <i>p</i> | <i>BF<sub>10</sub></i> |
| subunit                                                                                                     | 41.16    | 1         | 5.73                    |          |                        |
| transfection                                                                                                | 0.02     | 1         | 31                      |          |                        |
| subunit:transfection                                                                                        | 40.71    | 1         | 31                      | <.001    | 5.47E+6                |
| Source (random)                                                                                             | <i>N</i> | ICC       |                         |          |                        |
| pair:(slice:animal)                                                                                         | 33       | .00       |                         |          |                        |
| slice:animal                                                                                                | 21       | .00       |                         |          |                        |
| animal                                                                                                      | 9        | .17       |                         |          |                        |
| Residual                                                                                                    |          | .83       |                         |          |                        |

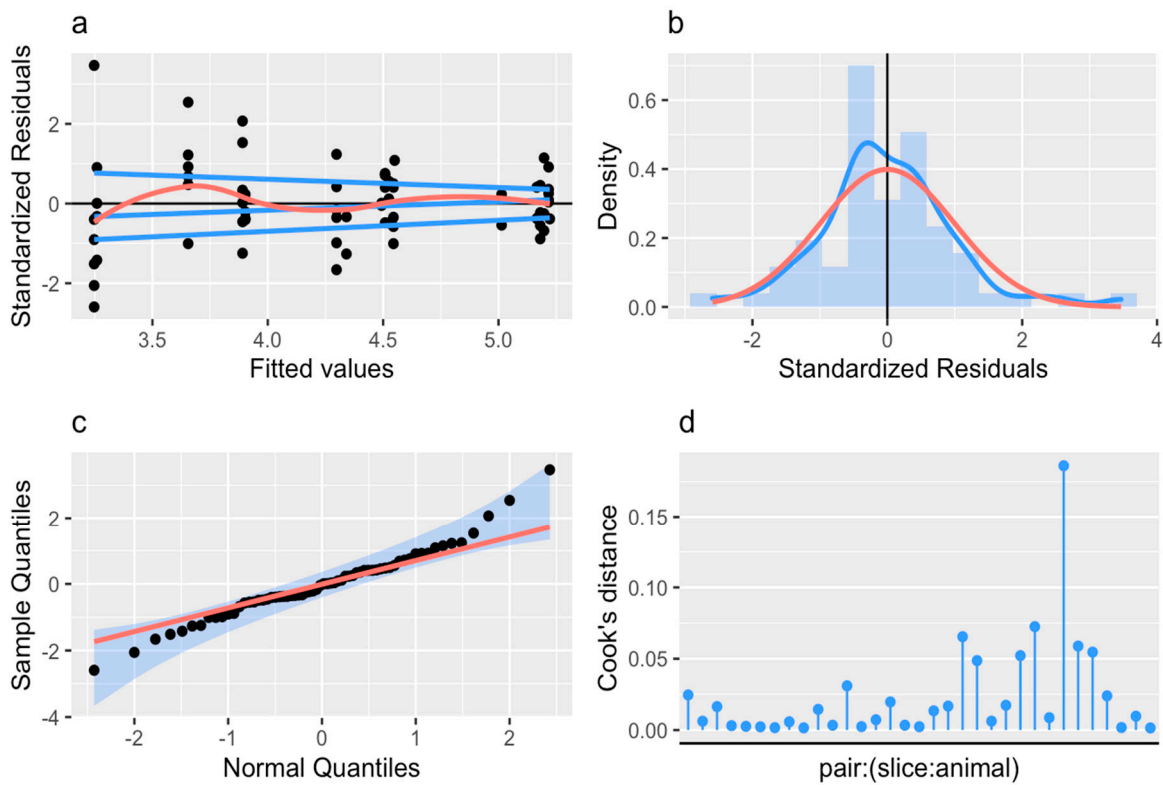

**Figure S1.11. NMDA-EPSC charge transfer in GluN2A or 2B knockout neurons rescued with C436R mutants.**

**Top.** Summary tables based on a LMM predicting NMDA-EPSC charge transfer from the co-transfection of the C436R mutant in *GRIN2A* or *GRIN2B* subunits together with Cre-GFP in CA1 neurons of *Grin2a<sup>fl/fl</sup>* or *Grin2b<sup>fl/fl</sup>* slices respectively. Fixed effects are summarised as an ANOVA table with the interaction term decomposed into orthogonal contrasts (A-D see Table S1). The *p*-value and Bayes factor for the interaction term (subunit:transfection) indicate a highly significant effect of transfecting different subunits (GluN2A or 2B) of the C436R mutant on the charge transfer of NMDA-EPSCs in KO neurons. Of the variance not accounted for by the fixed effects, 11%, 53%, 0% and 36% was explained by variability between recording pairs, slices, animals, and residual (unexplained) variance respectively. **Bottom.** Model residuals appeared to be homoscedastic (a), normally distributed (b, c), without overt outliers (a, c) and without influential data points (i.e. Cook's distance < 1.0) (d). A breakdown of samples sizes is reported in Table S3.

| Response                                                                                                     |       |     |                   |       |                  |
|--------------------------------------------------------------------------------------------------------------|-------|-----|-------------------|-------|------------------|
| NMDA-EPSC charge transfer                                                                                    |       |     |                   |       |                  |
| Formula                                                                                                      |       |     |                   |       |                  |
| $\log(\text{charge}) \sim \text{subunit} * \text{transfection} + (1 \text{animal}/\text{slice}/\text{pair})$ |       |     |                   |       |                  |
| Source (Fixed)                                                                                               | F     | df  | df <sub>res</sub> | p     | BF <sub>10</sub> |
| subunit                                                                                                      | 32.11 | 1   | 5.32              |       |                  |
| transfection                                                                                                 | 10.16 | 1   | 31                |       |                  |
| subunit:transfection                                                                                         | 19.73 | 1   | 31                | <.001 | 468              |
| Source (random)                                                                                              | N     | ICC |                   |       |                  |
| pair:(slice:animal)                                                                                          | 96    | .11 |                   |       |                  |
| slice:animal                                                                                                 | 62    | .53 |                   |       |                  |
| animal                                                                                                       | 22    | .00 |                   |       |                  |
| Residual                                                                                                     |       | .36 |                   |       |                  |

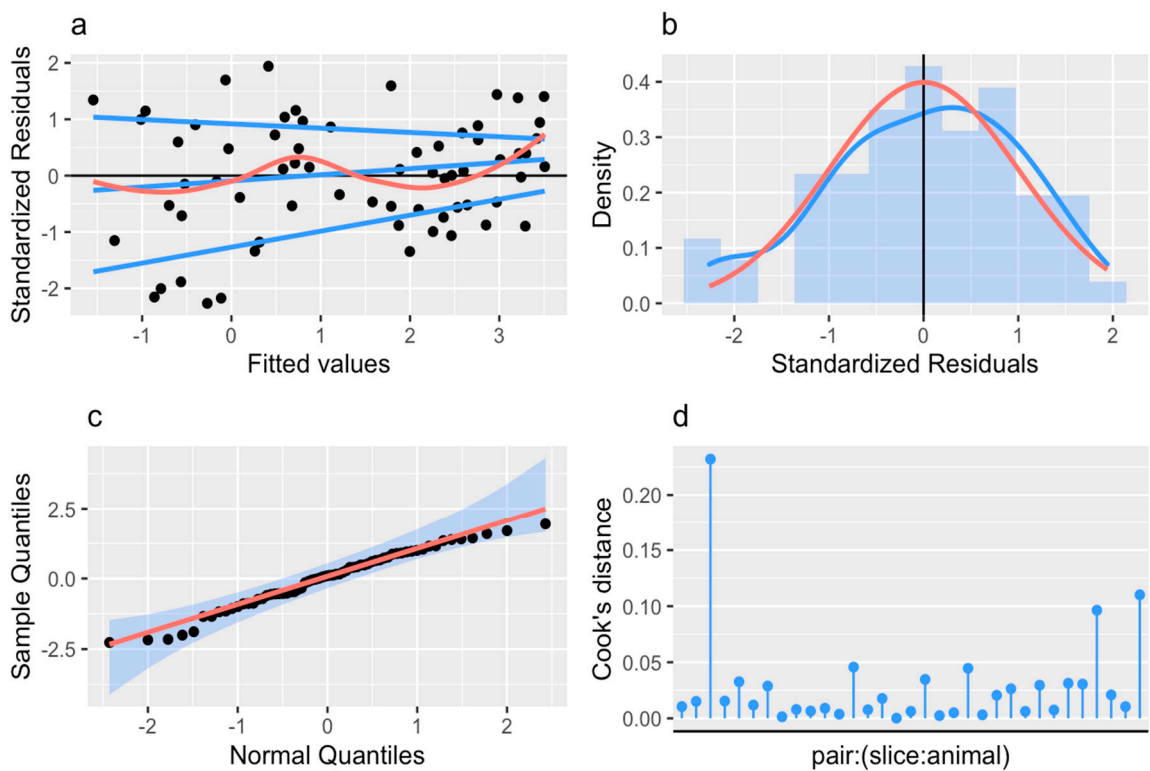

**Figure S1.12. NMDA-EPSC charge transfer in neurons expressing *GluN2B* knockout alleles.**

**Top.** Summary tables based on a LMM predicting NMDA-EPSC charge transfer from the transfection of Cre-GFP in CA1 neurons of slices with different genotypes of the floxed *Grin2b* allele. Fixed effects are summarised as an ANOVA table with the interaction term split into polynomial contrasts and followed up with pairwise comparisons by Westfall stepwise posthoc tests. The *p*-value and Bayes factor for the interaction term (subunit:transfection) indicate a highly significant effect of loss-of-function (null) *GluN2B* alleles on the charge transfer of NMDA-EPSCs. Of the variance not accounted for by the fixed effects, 15%, 35%, 10% and 40% was explained by variability between recording pairs, slices, animals, and residual (unexplained) variance respectively. **Bottom.** Model residuals appeared to be homoscedastic (**a**), normally distributed (**b, c**), without overt outliers (**a, c**) and without influential data points (i.e. Cook's distance < 1.0) (**d**). A breakdown of samples sizes is reported in Table S3.

## Response

NMDA-EPSC charge transfer (charge)

## Formula

$\log(\text{charge}) \sim \text{genotype} * \text{transfection} + (1|\text{animal}/\text{slice}/\text{pair})$

| Source (Fixed)        | <i>F</i> | <i>df</i> | <i>df<sub>res</sub></i> | <i>p</i> | <i>BF<sub>10</sub></i> |
|-----------------------|----------|-----------|-------------------------|----------|------------------------|
| genotype              | 5.15     | 2         | 13.6                    |          |                        |
| transfection          | 106.45   | 1         | 104                     |          |                        |
| genotype:transfection | 61.7     | 2         | 104                     | <.001    | 1.6E+17                |
| Linear                | 94.0     | 1         | 104                     | <.001    |                        |
| Quadratic             | 25.9     | 1         | 104                     | <.001    |                        |

| Posthoc test | <i>t</i> | <i>df</i> | <i>p<sub>adj</sub></i> |
|--------------|----------|-----------|------------------------|
| +/+ vs. +/-  | -0.53    | 104       | .60                    |
| +/+ vs. -/-  | -9.70    | 104       | <.001                  |
| +/- vs. -/-  | -9.45    | 104       | <.001                  |

| Source (random)     | <i>N</i> | <i>ICC</i> |
|---------------------|----------|------------|
| pair:(slice:animal) | 107      | .15        |
| slice:animal        | 56       | .35        |
| animal              | 22       | .10        |
| Residual            |          | .40        |

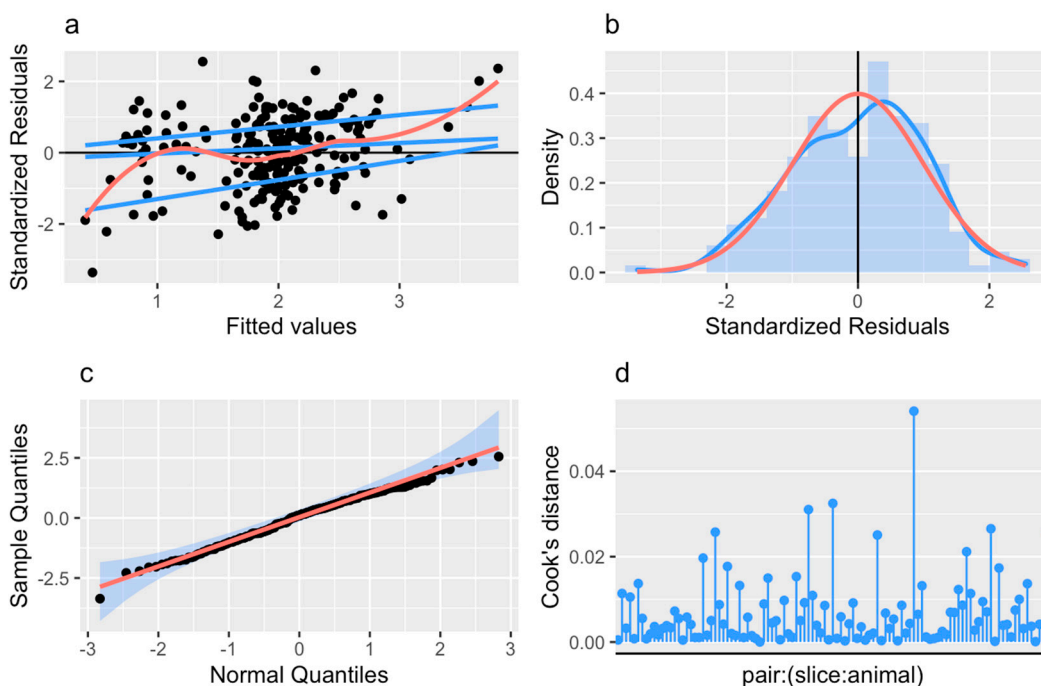



**Figure S1.13. NMDA-EPSC peak amplitudes in neurons expressing *GluN2B* knockout alleles.**

**Top.** Summary tables based on a LMM predicting NMDA-EPSC peak amplitudes from the transfection of Cre-GFP in CA1 neurons of slices with different genotypes of the floxed *Grin2b* allele. Fixed effects are summarised as an ANOVA table with the interaction term split into polynomial contrasts and followed up with pairwise comparisons by Westfall stepwise posthoc tests. The *p*-value and Bayes factor for the interaction term (subunit:transfection) indicate a highly significant effect of loss-of-function (null) *GluN2B* alleles on the charge transfer of NMDA-EPSCs. Of the variance not accounted for by the fixed effects, 14%, 33%, 6% and 47% was explained by variability between slices, animals, and residual (unexplained) variance respectively. **Bottom.** Model residuals appeared to be homoscedastic (**a**), normally distributed (**b, c**), without overt outliers (**a, c**) and without influential data points (i.e. Cook's distance < 1.0) (**d**). A breakdown of samples sizes is reported in Table S3.

| Response                                                                                                    |          |            |                         |                        |                        |
|-------------------------------------------------------------------------------------------------------------|----------|------------|-------------------------|------------------------|------------------------|
| NMDA-EPSC peak amplitude (peak)                                                                             |          |            |                         |                        |                        |
| Formula                                                                                                     |          |            |                         |                        |                        |
| $\log(\text{peak}) \sim \text{genotype} * \text{transfection} + (1 \text{animal}/\text{slice}/\text{pair})$ |          |            |                         |                        |                        |
| Source (Fixed)                                                                                              | <i>F</i> | <i>df</i>  | <i>df<sub>res</sub></i> | <i>p</i>               | <i>BF<sub>10</sub></i> |
| genotype                                                                                                    | 1.53     | 2          | 13.08                   |                        |                        |
| transfection                                                                                                | 36.50    | 1          | 104                     |                        |                        |
| genotype:transfection                                                                                       | 17.57    | 2          | 104                     | <.001                  | 2.04E+05               |
| Linear                                                                                                      | 23.08    | 1          | 104                     | <.001                  |                        |
| Quadratic                                                                                                   | 10.95    | 1          | 104                     | .001                   |                        |
| Posthoc test                                                                                                | <i>t</i> |            | <i>df</i>               | <i>p<sub>adj</sub></i> |                        |
| +/+ vs. +/-                                                                                                 | 0.41     |            | 104                     | .684                   |                        |
| +/+ vs. -/-                                                                                                 | -4.80    |            | 104                     | <.001                  |                        |
| +/- vs. -/-                                                                                                 | -5.37    |            | 104                     | <.001                  |                        |
| Source (random)                                                                                             | <i>N</i> | <i>ICC</i> |                         |                        |                        |
| pair:(slice:animal)                                                                                         | 107      | .14        |                         |                        |                        |
| slice:animal                                                                                                | 56       | .33        |                         |                        |                        |
| animal                                                                                                      | 22       | .06        |                         |                        |                        |
| Residual                                                                                                    |          | .47        |                         |                        |                        |

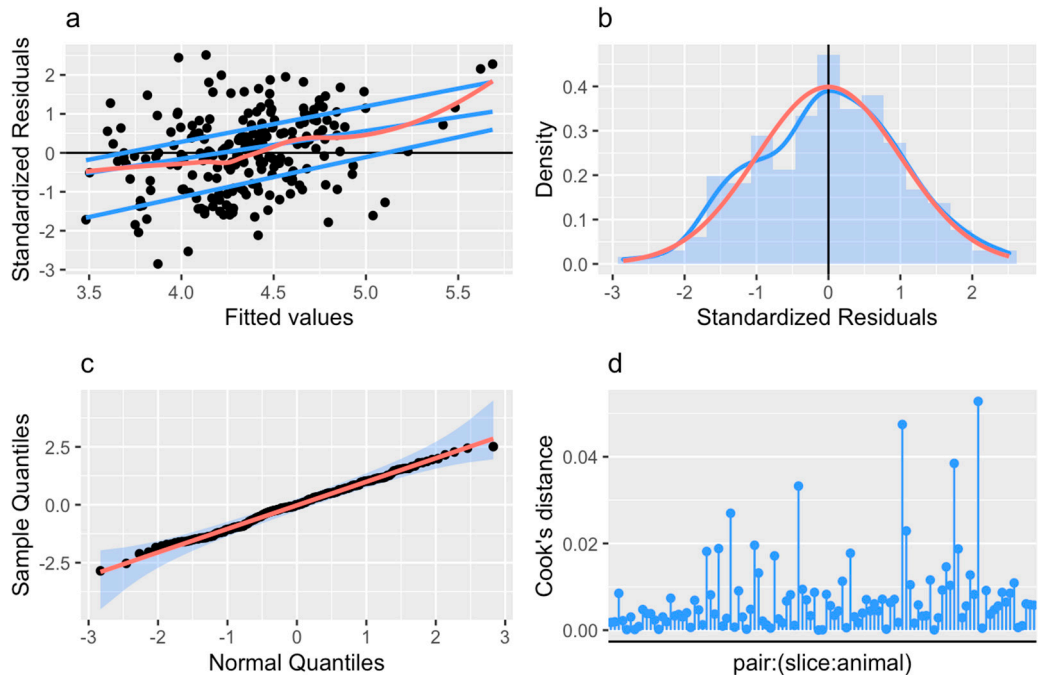



**Figure S1.14. NMDA-EPSC decay time constant in neurons expressing *GluNB* knockout alleles.**

**Top.** Summary tables based on a LMM predicting NMDA-EPSC decay time constant from the transfection of Cre-GFP in CA1 neurons of slices with different genotypes of the floxed *Grin2b* allele. Fixed effects are summarised as an ANOVA table with the interaction term split into polynomial contrasts and followed up with pairwise comparisons by Westfall stepwise posthoc tests. The *p*-value and Bayes factor for the interaction term (genotype:transfection) indicate a highly significant effect of loss-of-function (null) *GluN2B* alleles on the charge transfer of NMDA-EPSCs. Of the variance not accounted for by the fixed effects, 5%, 28%, 0% and 67% was explained by variability between recording pairs, slices, animals, and residual (unexplained) variance respectively. **Bottom.** Model residuals appeared to be homoscedastic (a), normally distributed (b, c), without overt outliers (a, c) and without influential data points (i.e. Cook's distance < 1.0) (d). A breakdown of samples sizes is reported in Table S3.

## Response

NMDA-EPSC decay time constant (decay)

## Formula

$\log(\text{decay}) \sim \text{genotype} * \text{transfection} + (1|\text{animal/slice/pair})$

| Source (Fixed)        | <i>F</i> | <i>df</i> | <i>df</i> <sub>res</sub> | <i>p</i> | <i>BF</i> <sub>10</sub> |
|-----------------------|----------|-----------|--------------------------|----------|-------------------------|
| genotype              | 18.41    | 2         | 12.1                     |          |                         |
| transfection          | 67.22    | 1         | 104                      |          |                         |
| genotype:transfection | 35.84    | 2         | 104                      | <.001    | 9.43E+11                |
| Linear                | 66.97    | 1         | 104                      | <.001    |                         |
| Quadratic             | 3.59     | 1         | 104                      | .061     |                         |

| Posthoc test | <i>t</i> | <i>df</i> | <i>p</i> <sub>adj</sub> |
|--------------|----------|-----------|-------------------------|
| +/+ vs. +/-  | -2.48    | 104       | .015                    |
| +/+ vs. -/-  | -8.18    | 104       | <.001                   |
| +/- vs. -/-  | -5.87    | 104       | <.001                   |

| Source (random)     | <i>N</i> | ICC |
|---------------------|----------|-----|
| pair:(slice:animal) | 107      | .05 |
| slice:animal        | 56       | .28 |
| animal              | 22       | .00 |
| Residual            |          | .67 |

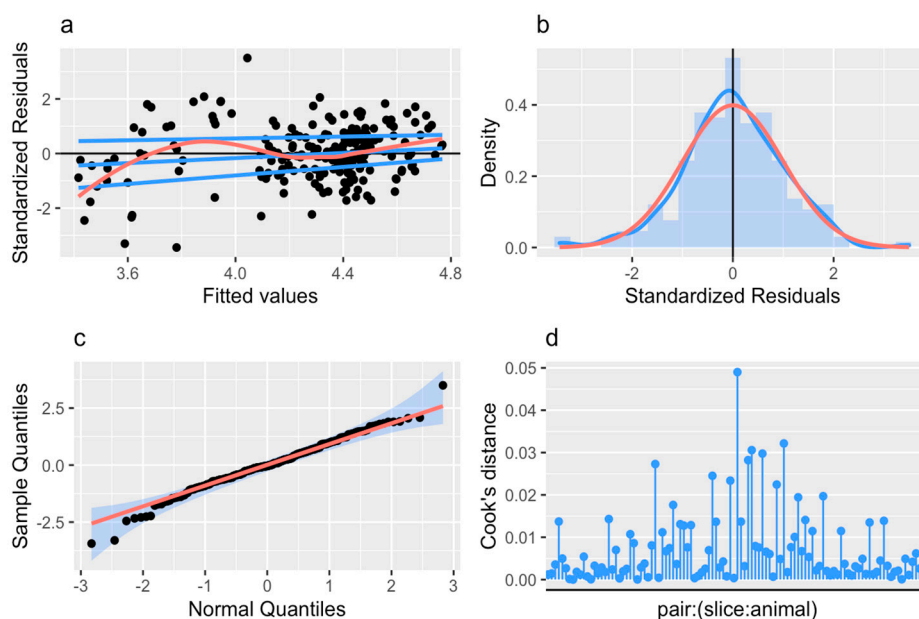

**Figure S1.15. NMDA-EPSC risetimes in neurons expressing *GluN2B* knockout alleles.**

**Top.** Summary tables based on a LMM predicting NMDA-EPSC rise time from the transfection of Cre-GFP in CA1 neurons of slices with different genotypes of the floxed *Grin2b* allele. Fixed effects are summarised as an ANOVA table with the interaction term split into polynomial contrasts and followed up with pairwise comparisons by Westfall stepwise posthoc tests. The *p*-value and Bayes factor for the interaction term (genotype:transfection) indicate a significant effect of loss-of-function (null) *GluN2B* alleles on the rise time of NMDA-EPSCs. Of the variance not accounted for by the fixed effects, 5%, 55%, 0% and 40% was explained by variability between recording pairs, slices, animals, and residual (unexplained) variance respectively. **Bottom.** Model residuals appeared to be homoscedastic (**a**), normally distributed (**b, c**), without overt outliers (**a, c**) and without influential data points (i.e. Cook's distance < 1.0) (**d**). A breakdown of samples sizes is reported in Table S3.

#### Response

NMDA-EPSC 20-80% risetime (rise)

#### Formula

$\log(\text{rise}) \sim \text{genotype} * \text{transfection} + (1|\text{animal/slice/pair})$

| Source (Fixed)        | <i>F</i> | <i>df</i> | <i>df<sub>res</sub></i> | <i>p</i> | <i>BF<sub>10</sub></i> |
|-----------------------|----------|-----------|-------------------------|----------|------------------------|
| genotype              | 0.52     | 2         | 12.13                   |          |                        |
| transfection          | 15.67    | 1         | 104                     |          |                        |
| genotype:transfection | 6.50     | 2         | 104                     | .002     | 28.2                   |
| Linear                | 12.72    | 1         | 104                     | <.001    |                        |
| Quadratic             | 0.16     | 1         | 104                     | .69      |                        |

| Posthoc test | <i>t</i> | <i>df</i> | <i>p<sub>adj</sub></i> |
|--------------|----------|-----------|------------------------|
| +/+ vs. +/-  | -1.45    | 104       | .15                    |
| +/+ vs. -/-  | -3.57    | 104       | .002                   |
| +/- vs. -/-  | -2.18    | 104       | .03                    |

| Source (random)     | <i>N</i> | ICC |
|---------------------|----------|-----|
| pair:(slice:animal) | 107      | .05 |
| slice:animal        | 56       | .55 |
| animal              | 22       | .00 |
| Residual            |          | .40 |

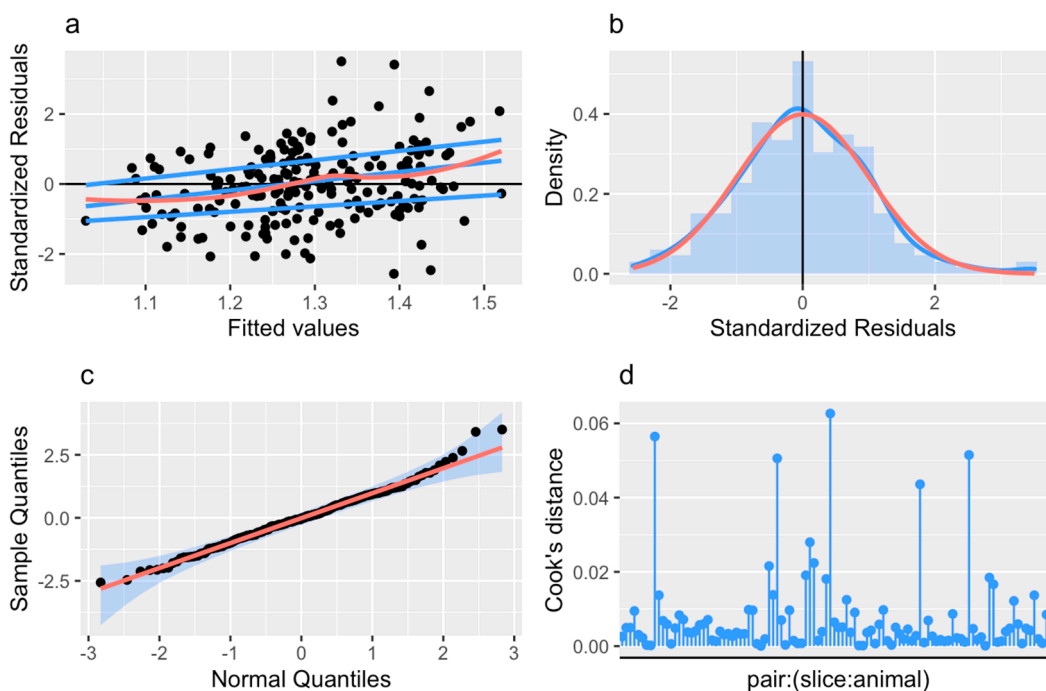

## Figure S2: Effective rescue of native mouse *GluN2B* by human *GluN2B*

- a)** The experimental approach used to investigate the effect of missense mutations, by co-expressing Cre-GFP with human *GRIN2B* cDNA by single-cell electroporation around day 7 *in vitro*. The action of Cre recombinase results in the decline of native mouse *GluN2B* expression in Cre-transfected neurons of organotypic slices from *Grin2b<sup>fl/fl</sup>* (as well as *GluN2A* in *Grin2a<sup>fl/fl</sup> b<sup>fl/fl</sup>*) mice slices. Meanwhile, native *GluN2B* is replaced by the co-expressed human *GluN2B*.
- b)** The transfected/untransfected ratios for NMDAR-EPSC peak amplitude and weighted decay time constants for varying amounts of co-transfected human *GRIN2B* cDNA. Arrow indicates the concentration that effectively rescued the peak amplitude and decay time constant of NMDAR-EPSCs. Error bars are 95% CI. The grey arrow indicates the concentration of *GRIN2B* cDNA used to rescue NMDA-EPSCs.
- c)** Example traces of NMDA-EPSCs measured at +20 mV to illustrate rescue of peak amplitude (left) and peak-scaled to illustrate rescue of the decay kinetics (right), in *GluN2B* KO cells by human *GluN2B*.

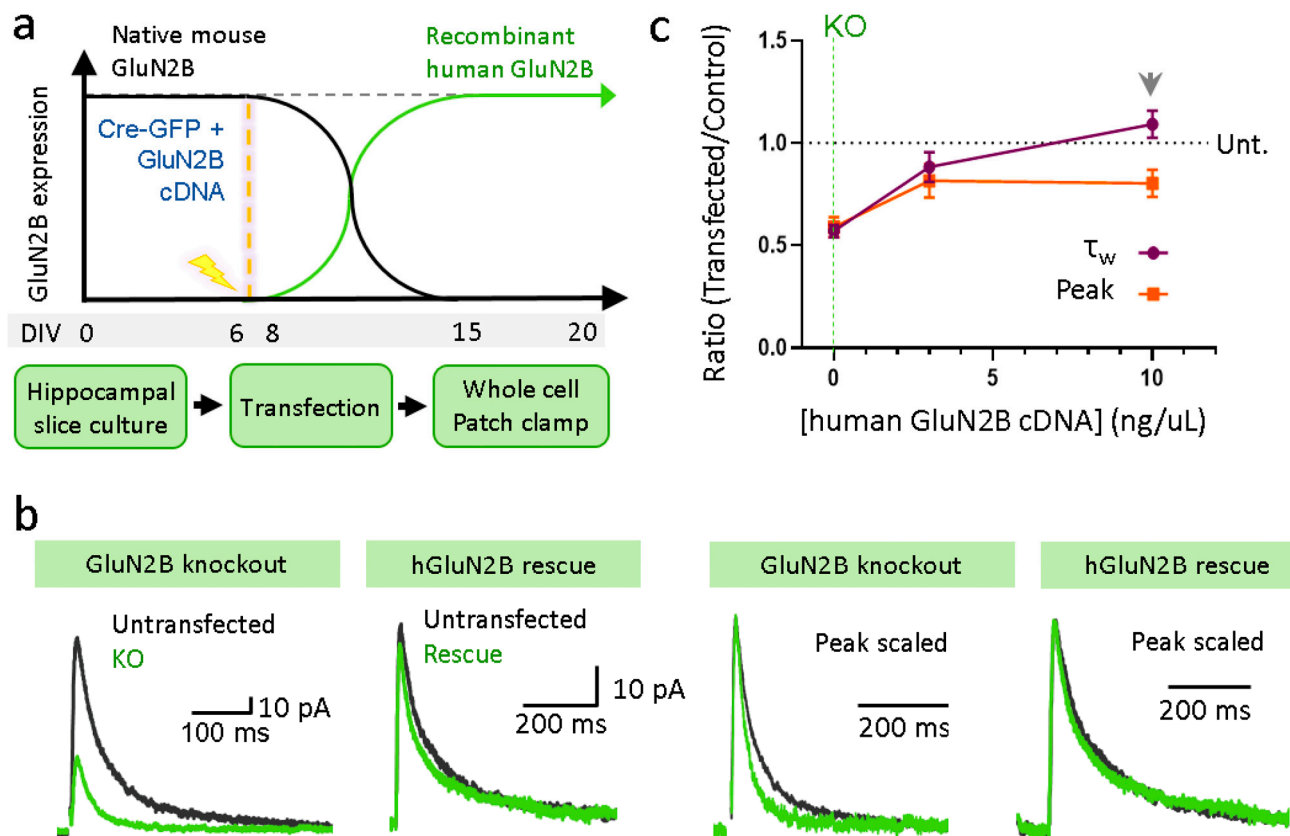

**Figure S3: *GluN2B* mutations are not associated with much effect on AMPAR-EPSCs.**

**ai)** Data points of measurements made in individual neurons. Matched data points, for simultaneously recorded untransfected and transfected neurons, are connected by a line. **aii)** Response ratios (transfected/untransfected) are expressed as a percentage and plotted for each pair of transfected-untransfected neurons. Crossbars in **i)** and **ii)** show the estimated marginal means with 95% confidence intervals backtransformed from the linear mixed models (Figure S1). Hypothesis tests are orthogonal contrasts based on *a priori* clustering of the mutations. Standardized effect sizes (*r*) for comparisons of each mutant with WT for response ratios of peak amplitude in **aii** were +.06, +.09, +.10, and -.10 (*N* = 95).

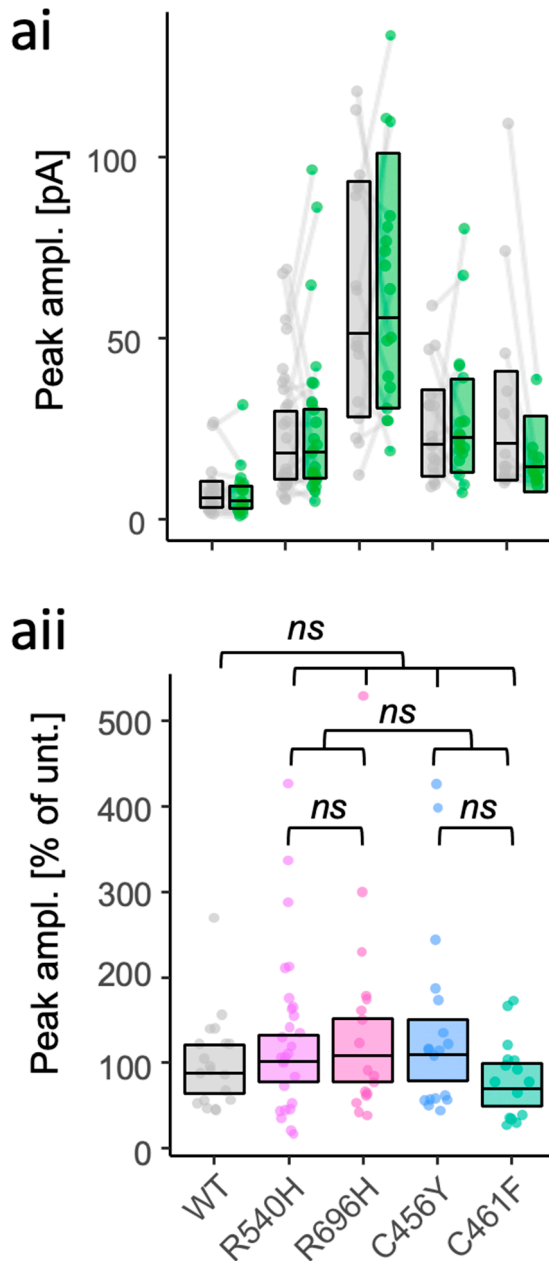

**Figure S4: NMDA-EPSC decay is similar after selective inhibition of GluN2A-containing NMDA receptors**

**ai)** NMDA-EPSC decay time constants before, and 13.5 to 17.5 minutes after, the addition of 10  $\mu$ M TCN-201. Each point represents the weighted decay time constant of the ensemble mean of 40 NMDA-EPSCs. Each pair of points connected by a line correspond to measurements made from individual neurons before and after addition of TCN-201.

**aii)** Response ratios (after/before) calculated from (ai) are expressed as a percentage and plotted for each pair of before-after recordings. Crossbars show the estimated marginal means with 95% confidence intervals backtransformed from the linear mixed models. Standardised effect sizes ( $r$ ) for each mutant compared to WT for were -.04 and -.10 for mutants R696H and C456Y respectively ( $N = 38$ ).

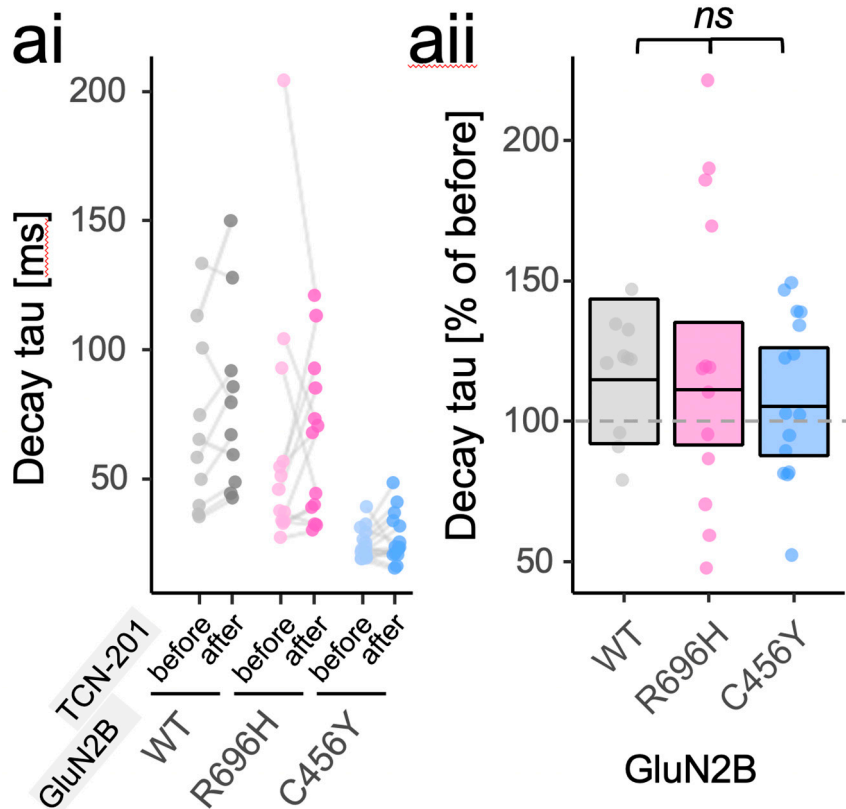

**Table S1. Matrix of orthogonal contrasts based on a priori clustering of mutations.**

Matrix of orthogonal contrasts used in the analysis of data in Figure 2. Conditional table formatting is used to colour code the mutants involved in each contrast and illustrate their weighting.

| Contrast      | A             | B          | C    | D    |
|---------------|---------------|------------|------|------|
| <i>GRIN2B</i> | WT vs Mutants | LoF vs GoF | LoF  | GoF  |
| WT            | -0.8          | 0          | 0    | 0    |
| R540H         | 0.2           | 0.5        | 0    | -0.5 |
| R696H         | 0.2           | 0.5        | 0    | 0.5  |
| C456Y         | 0.2           | -0.5       | -0.5 | 0    |
| C461F         | 0.2           | -0.5       | 0.5  | 0    |

**Table S2: Primers used to generate mutant *GluN2B* constructs from WT pCI-Neo *GRIN2B***

| <b><i>GRIN2B</i><br/>MUTATION</b> | <b>Forward primer (5' to 3')</b> | <b>Reverse primer (5' to 3')</b> |
|-----------------------------------|----------------------------------|----------------------------------|
| <b>R540H</b>                      | GTGTCATGGTGTCACACAGCAATGGGACTGT  | ACAGTCCCATTGCTGTGTGACACCATGACAC  |
| <b>R696H</b>                      | CAGAGAGAAATATTCACAATAACTATGCAGA  | TCTGCATAGTTATTGTGAATATTTCTCTCTG  |
| <b>C456Y</b>                      | GTTACATCAAAAAATACTGCAAGGGGTTCTG  | CAGAACCCCTTGCAGTATTTTTTGATGTAAC  |
| <b>C461F</b>                      | GCTGCAAGGGGTTCTTTATTGACATCCTTAA  | TTAAGGATGTCAATAAAGAACCCCTTGCAGC  |
| <b>C436R</b>                      | AGGAACACAGTCCCCCGCCAAAAACGCATAG  | CTATGCGTTTTTGGCGGGGGACTGTGTTCTT  |



**Table S3. Experiment sample sizes**

Sample sizes for experiments detailed in Figures S1.1-1.15 broken down into the number of recording cells (or cell pairs), number of slices, and number of animals. Abbreviations: DKO: GluN2A/B double knockout.

| Experiment relating to Figure 1 |       |        |         |
|---------------------------------|-------|--------|---------|
| Mutation                        | pairs | slices | animals |
| None (DKO)                      | 19    | 11     | 3       |
| WT                              | 19    | 13     | 3       |
| R540H                           | 12    | 9      | 2       |
| R696H                           | 16    | 10     | 3       |
| C456Y                           | 24    | 14     | 3       |

| Experiment relating to Figure 2 and S3 |       |        |         |
|----------------------------------------|-------|--------|---------|
| Mutation                               | pairs | slices | animals |
| WT                                     | 19    | 12     | 4       |
| R540H                                  | 27    | 18     | 6       |
| R696H                                  | 17    | 11     | 4       |
| C456Y                                  | 18    | 12     | 5       |
| C461F                                  | 15    | 9      | 3       |

| Experiment relating to Figure 3 |       |        |         |
|---------------------------------|-------|--------|---------|
| Genotype                        | cells | slices | animals |
| WT                              | 10    | 7      | 1       |
| R696H                           | 13    | 10     | 2       |
| C456Y                           | 15    | 9      | 2       |

| Experiment relating to Figure 5 |       |        |         |
|---------------------------------|-------|--------|---------|
| Mutation                        | pairs | slices | animals |
| C436R (N2B)                     | 16    | 9      | 3       |
| C436R (N2A)                     | 17    | 12     | 6       |

| Experiment relating to Figure 6 |       |        |         |
|---------------------------------|-------|--------|---------|
| Genotype                        | pairs | slices | animals |
| WT                              | 33    | 19     | 4       |
| HET                             | 37    | 18     | 11      |
| HOM                             | 37    | 19     | 7       |

**Table S4. Functional properties of NMDA receptor subtypes in HEK293T cells**

Responses from NMDA receptor subtypes were measured using fast-application whole-cell patch-clamp recordings and activated by brief 5 ms application of 1 mM glutamate in the continuous presence of 100  $\mu$ M glycine. Rise times are for 10–90% of the peak response amplitude, deactivation time constants were determined using two-exponential fits to obtain  $T_{fast}$ ,  $T_{slow}$ , and % fast is the fitted percentage of the fast component. <sup>a</sup> indicates that only a single-exponential was fitted to the deactivation time course. Decay time is the weighted time constant ( $T_{weighted}$ ) (see Materials and Methods). Data are mean  $\pm$  SEM, and  $N$  is the number of cells used to generate the data. Statistical tests on the log<sub>10</sub>-transformed weighted decay time constants are described in the legend of Fig. 4.

| Receptor                     | Rise time (ms) | $T_{fast}$ (ms) | $T_{slow}$ (ms) | % fast           | Decay time<br>$T_{weighted}$ (ms) | $N$ |
|------------------------------|----------------|-----------------|-----------------|------------------|-----------------------------------|-----|
| GluN1/2B <sup>WT</sup>       | 11.3 $\pm$ 0.8 | 238 $\pm$ 12    | 884 $\pm$ 68    | 65 $\pm$ 4       | 443 $\pm$ 15                      | 14  |
| GluN1/2B <sup>R540H</sup>    | 14.7 $\pm$ 0.9 | 456 $\pm$ 47    | 1421 $\pm$ 288  | 62 $\pm$ 5       | 833 $\pm$ 60                      | 8   |
| GluN1/2B <sup>R696H</sup>    | 4.6 $\pm$ 0.9  | 235 $\pm$ 31    | 1281 $\pm$ 264  | 55 $\pm$ 7       | 615 $\pm$ 41                      | 7   |
| GluN1/2A/2B <sup>WT</sup>    | 5.6 $\pm$ 0.3  | 41 $\pm$ 6      | 397 $\pm$ 197   | 90 $\pm$ 3       | 56 $\pm$ 6                        | 7   |
| GluN1/2A/2B <sup>R540H</sup> | 7.0 $\pm$ 0.8  | 37 $\pm$ 9      | 331 $\pm$ 102   | 83 $\pm$ 7       | 59 $\pm$ 9                        | 7   |
| GluN1/2A/2B <sup>R696H</sup> | 6.3 $\pm$ 0.3  | 44 $\pm$ 5      | 244 $\pm$ 36    | 80 $\pm$ 8       | 74 $\pm$ 9                        | 8   |
| GluN1/2A                     | 5.8 $\pm$ 0.8  | 45 $\pm$ 4      | -               | 100 <sup>a</sup> | 45 $\pm$ 4                        | 9   |

**Table S5. Effects of TCN-201 on responses from NMDA receptors in HEK293T cells**

Responses from NMDA receptor subtypes were measured using fast-application whole-cell patch-clamp recordings. Responses in the absence and presence of 5  $\mu$ M TCN-201 were activated by brief 5 ms application of 1 mM glutamate in the continuous presence of 3  $\mu$ M glycine. Deactivation time constants were determined using two-exponential fits, but the decay time ( $\tau_{\text{weighted}}$ ) is listed (see Materials and Methods). n.d. indicates that reliable measurements of the decay time could not be made because sufficient currents could not be detected. Data are mean  $\pm$  SEM, and  $N$  is the number of cells used to generate the data. The decay data were analysed by two-way (mixed model) ANOVA (Type III) testing the effects of TCN-201 on measurements of  $\log_{10}$ -transformed weighted decay time constants across the different receptors tested. Repeated measures were modelled for before and after application of TCN-201. We found no significant main effect of TCN-201 on the decays ( $F(1,26) = 0.032$ ,  $p = .86$ ) but did find a highly significant difference in the decays across the different receptors tested ( $F(5,26) = 111.2$ ,  $p = <.001$ ), consistent with our results in Fig. 4. Interpretation of the main effects was simplified by there being no statistically significant TCN-201  $\times$  receptor interaction ( $F(5,26) = 0.66$ ,  $p = .65$ ). Refer to the legend of Fig. 4 for the statistics on the % inhibition of the peak amplitude.

| Receptor                     | Decay time $\tau_{\text{weighted}}$ (ms) |               | % inhibition | $N$ |
|------------------------------|------------------------------------------|---------------|--------------|-----|
|                              | Before TCN-201                           | After TCN-201 |              |     |
| GluN1/2B <sup>WT</sup>       | 365 $\pm$ 12                             | 355 $\pm$ 27  | 4 $\pm$ 4    | 5   |
| GluN1/2B <sup>R540H</sup>    | 675 $\pm$ 67                             | 613 $\pm$ 105 | 19 $\pm$ 5   | 5   |
| GluN1/2B <sup>R696H</sup>    | 490 $\pm$ 24                             | 462 $\pm$ 24  | 4 $\pm$ 6    | 5   |
| GluN1/2A/2B <sup>WT</sup>    | 50 $\pm$ 2                               | 60 $\pm$ 2    | 70 $\pm$ 6   | 6   |
| GluN1/2A/2B <sup>R540H</sup> | 58 $\pm$ 12                              | 68 $\pm$ 11   | 82 $\pm$ 6   | 5   |
| GluN1/2A/2B <sup>R696H</sup> | 65 $\pm$ 8                               | 67 $\pm$ 10   | 70 $\pm$ 6   | 6   |
| GluN1/2A                     | 40 $\pm$ 3                               | n.d.          | 95 $\pm$ 2   | 4   |
